# Supplementary material for: Hierarchically structured C@SnO2@C nanofiber bundles with high stability and effective ambipolar diffusion kinetics for high-performance Li-ion batteries
Source: Royal Society of Chemistry journal article supplement (doi:10.1039/c6ta06622d), 2016-01-01
Supplement: c6ta06622d1.pdf [file c6ta06622d1.pdf]

## **Electronic supplementary information**

### **Hierarchically structured C@SnO<sub>2</sub>@C nanofiber bundles with high stability and effective ambipolar diffusion kinetics for high-performance Li-ion batteries**

Xiaoling Wang,<sup>a</sup> Jingze Li,<sup>a</sup> Zeui Chen,<sup>b</sup> Lijie Lei,<sup>b</sup> Xuepin Liao,<sup>a</sup> Xin Huang<sup>a,b\*</sup> and Bi Shi<sup>b</sup>

<sup>a</sup> Department of Biomass Chemistry and Engineering, Sichuan University, Chengdu 610065, China. Email: xhuangscu@163.com

<sup>b</sup> National Engineering Laboratory for Clear Technology of Leather Manufacture, Sichuan University, Chengdu 610065, China

\*Correspondence - xhuangscu@163.com

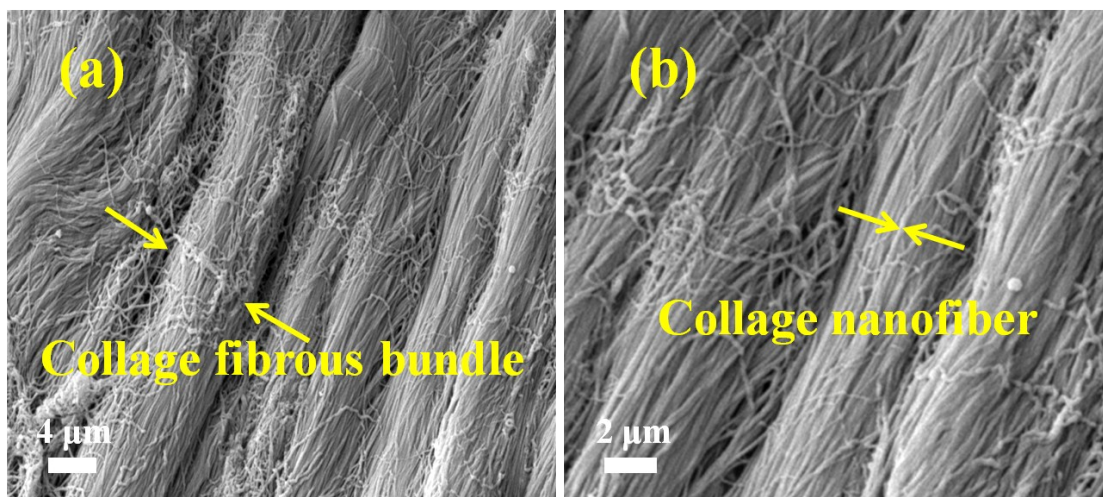

**Fig. S1.** SEM images of CF at different magnifications.

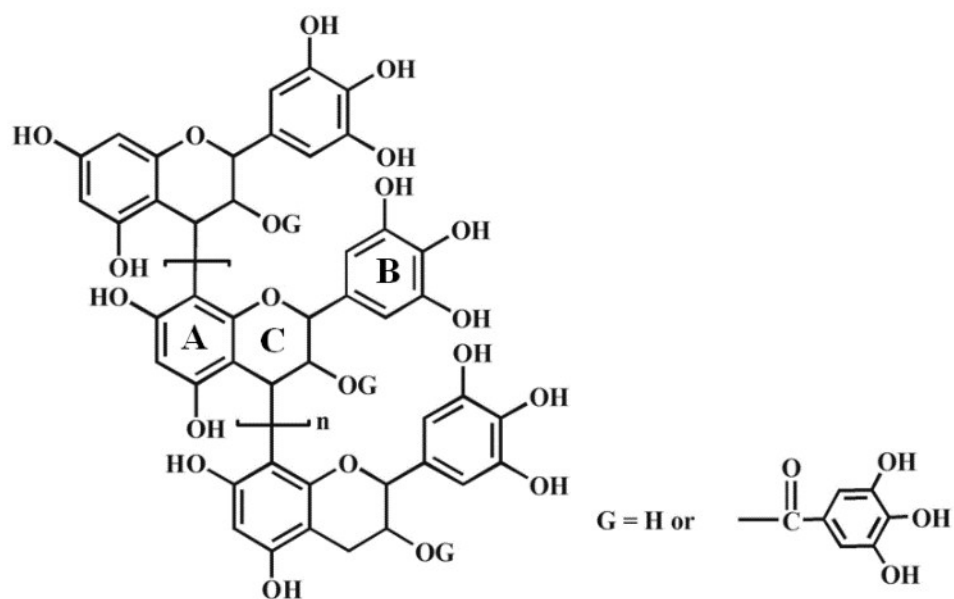

**Fig. S2.** Molecular structure of bayberry tannin (BT). BT contains abundant hydrophilic hydroxyl groups and hydrophobic aromatic backbone, which can be coated onto CF through hydrogen-bonding and hydrophobic interactions.<sup>1-3</sup>

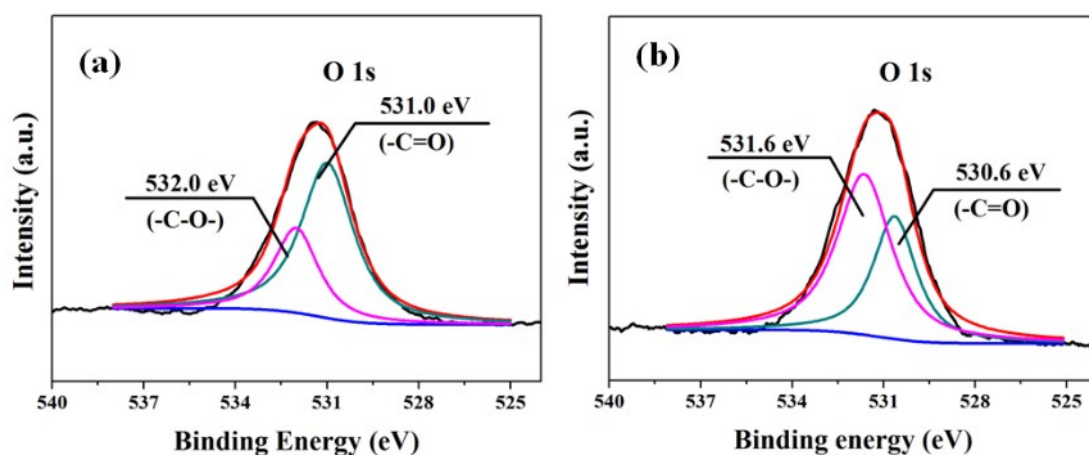

**Fig. S3.** The O 1s X-ray photoelectron spectra (XPS) of (a) CF and (b) CF@Sn<sup>4+</sup>. In Fig. S3a, the peaks at 532.0 eV and 531.0 eV are attributed to -C-O and -C=O groups of CF.<sup>4</sup> After CF was reacted with Sn<sup>4+</sup> (Fig. S3b), the peak intensity of -C-O is substantially increased along with significant decreased peak intensity of -C=O. These changes suggest that CF should be mainly chelated with Sn<sup>4+</sup> via its -COOH groups.

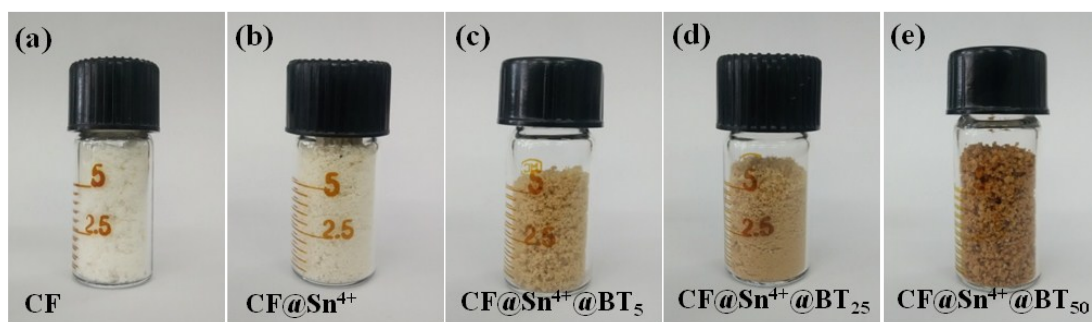

**Fig. S4.** Digital images of (a) CF, (b) CF@Sn<sup>4+</sup>, (c) CF@Sn<sup>4+</sup>@BT<sub>5</sub>, (d) CF@Sn<sup>4+</sup>@BT<sub>25</sub> and (e) CF@Sn<sup>4+</sup>@BT<sub>50</sub>.

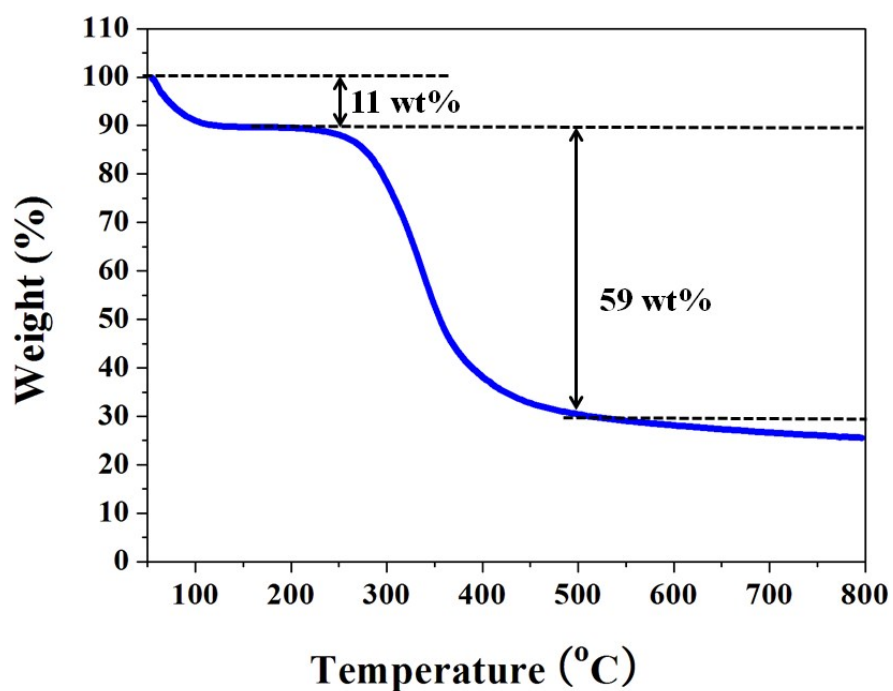

**Fig. S5.** Thermogravimetry analysis (TGA) of CF in nitrogen atmosphere with a heating rate of  $10\text{ }^{\circ}\text{C min}^{-1}$ . The TGA curve shows two steps of weight loss below  $500\text{ }^{\circ}\text{C}$ . The first step of weight loss below  $150\text{ }^{\circ}\text{C}$  is associated with the loss of adsorbed water on CF, and the second step of weight loss is due to the decomposition of collagen protein in the temperature range of  $250\text{-}500\text{ }^{\circ}\text{C}$ .

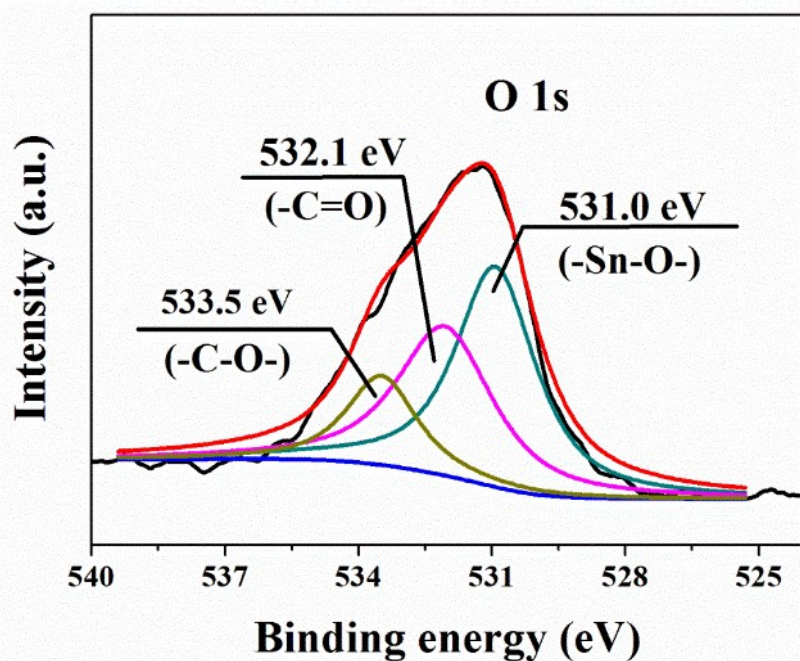

**Fig. S6.** The O 1s XPS of C@SnO<sub>2</sub>@C. The spectra consist of three peaks at 533.5 eV, 532.1 eV and 530.9 eV, which are attributed to -C-O, -C=O and -Sn-O-, respectively. The peak of -Sn-O- is ascribed to the existing of SnO<sub>2</sub>, while the presence of -C-O and -C=O suggests that carboxyl group and hydroxyl group still exist in C@SnO<sub>2</sub>@C, which are responsible for the stabilization of SnO<sub>2</sub> nanoparticles on C@SnO<sub>2</sub>@C.

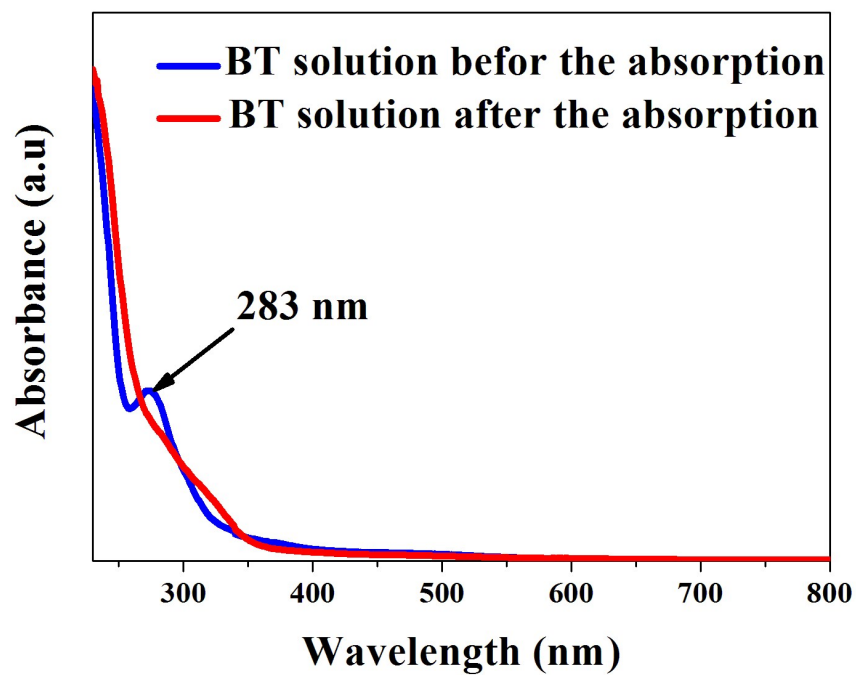

**Fig. S7.** UV-vis absorption spectra of BT solution before and after the adsorption by SnO<sub>2</sub> nanofiber bundle. Before the adsorption, BT showed a major peak around 283 nm, which disappeared after the adsorption of SnO<sub>2</sub>, confirming the successful coating of BT onto SnO<sub>2</sub> nanofiber bundle.



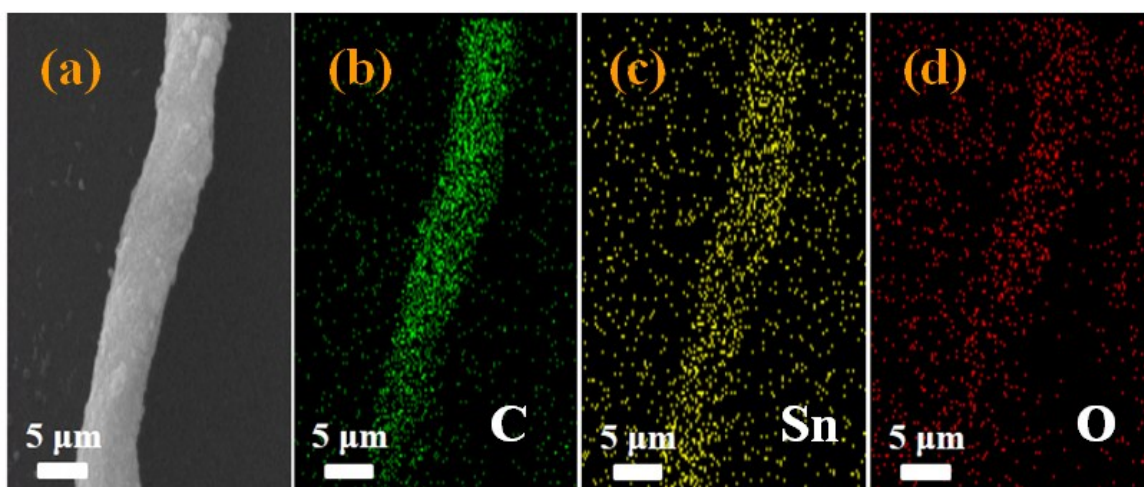

**Fig. S8.** SEM-EDS mapping images of C, Sn, O in C@SnO<sub>2</sub>@C.

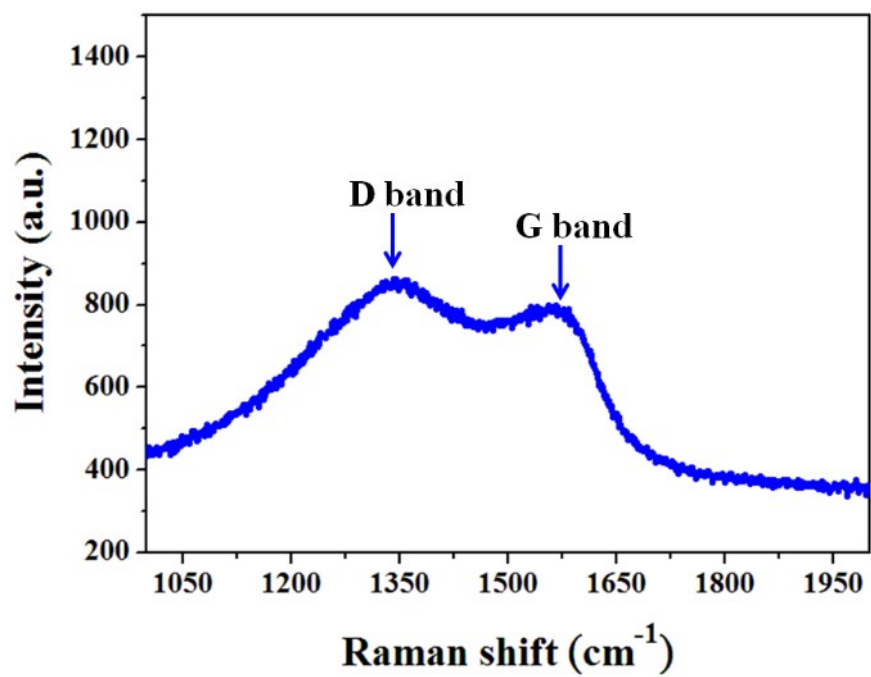

Fig. S9. Raman spectrum of C@SnO<sub>2</sub>@C.

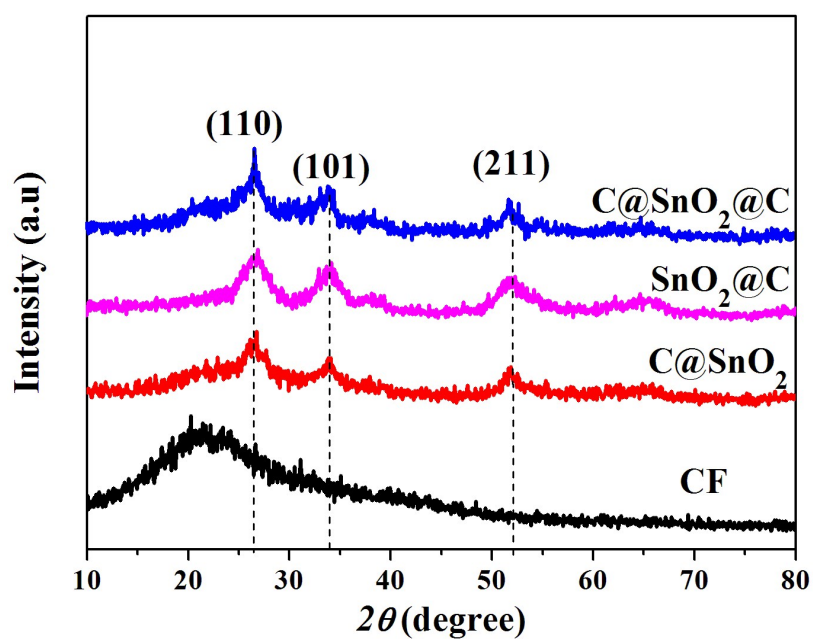

**Fig. S10.** X-ray diffraction (XRD) patterns of CF, C@SnO<sub>2</sub>@C, C@SnO<sub>2</sub> and SnO<sub>2</sub>@C. XRD pattern of CF shows one broad characteristic peak at 23°, which is attributed to the amorphous polymer phase of CF. XRD patterns of C@SnO<sub>2</sub>@C, C@SnO<sub>2</sub> and SnO<sub>2</sub>@C exhibit typical (110), (101) and (211) crystalline plane diffraction peaks of face-centered-cubic (*fcc*) SnO<sub>2</sub> at 26.6°, 33.8° and 52.3°, respectively.<sup>5</sup>

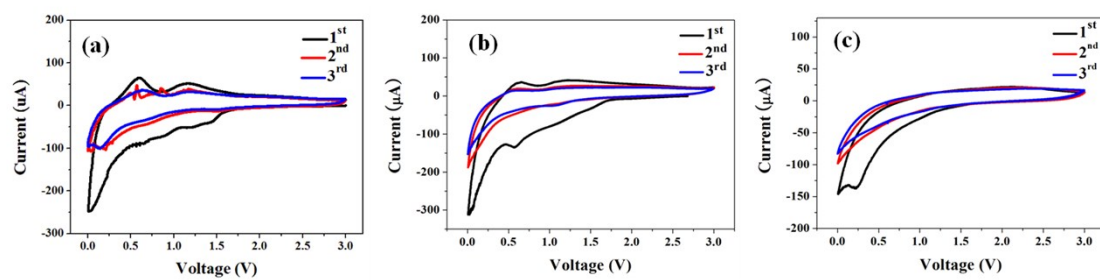

**Fig. S11.** Initial three cyclic voltammograms (CV) of C@SnO<sub>2</sub>@C (a), C@SnO<sub>2</sub> (b) and SnO<sub>2</sub>@C (c) at a scan rate of 0.05 mV s<sup>-1</sup>.

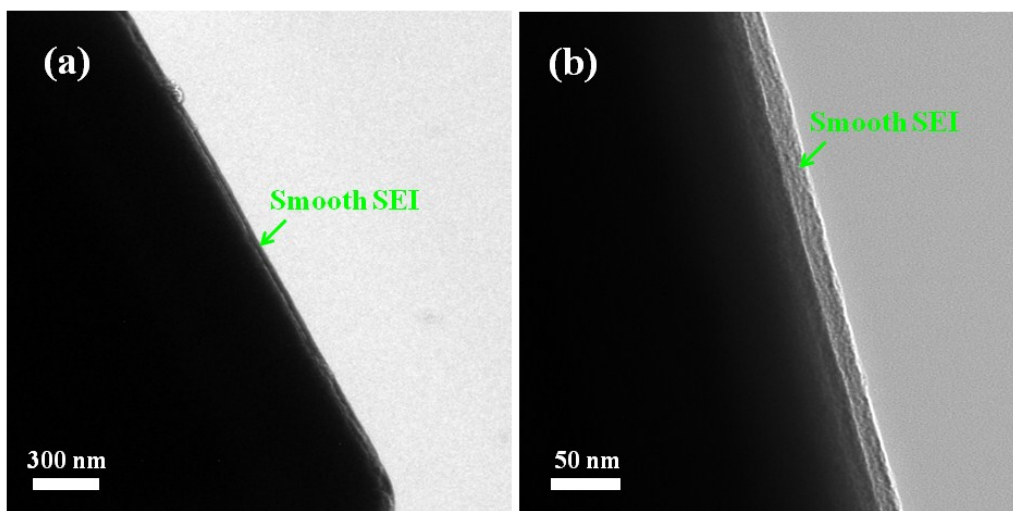

**Fig. S12.** TEM images of C@SnO<sub>2</sub>@C after the rate tests.

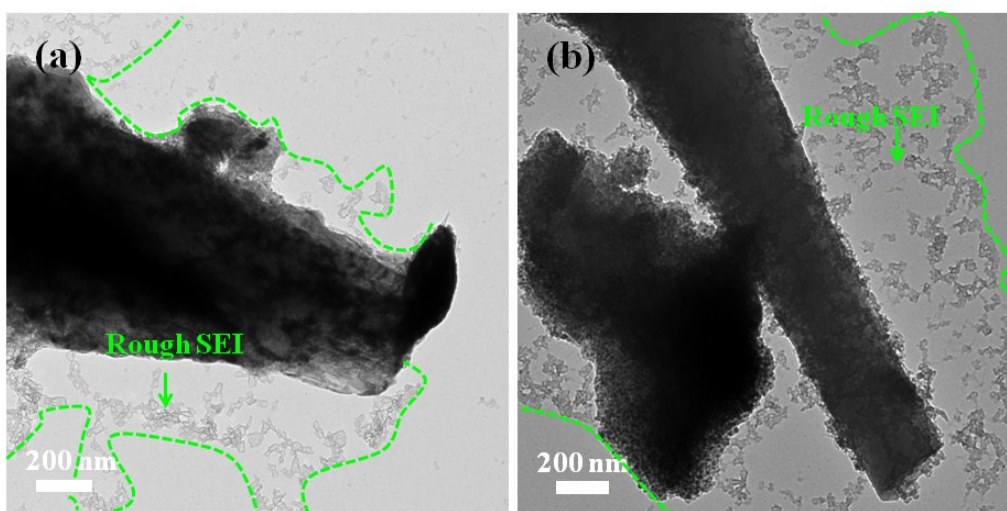

**Fig. S13.** TEM images of C@SnO<sub>2</sub> after the rate tests.

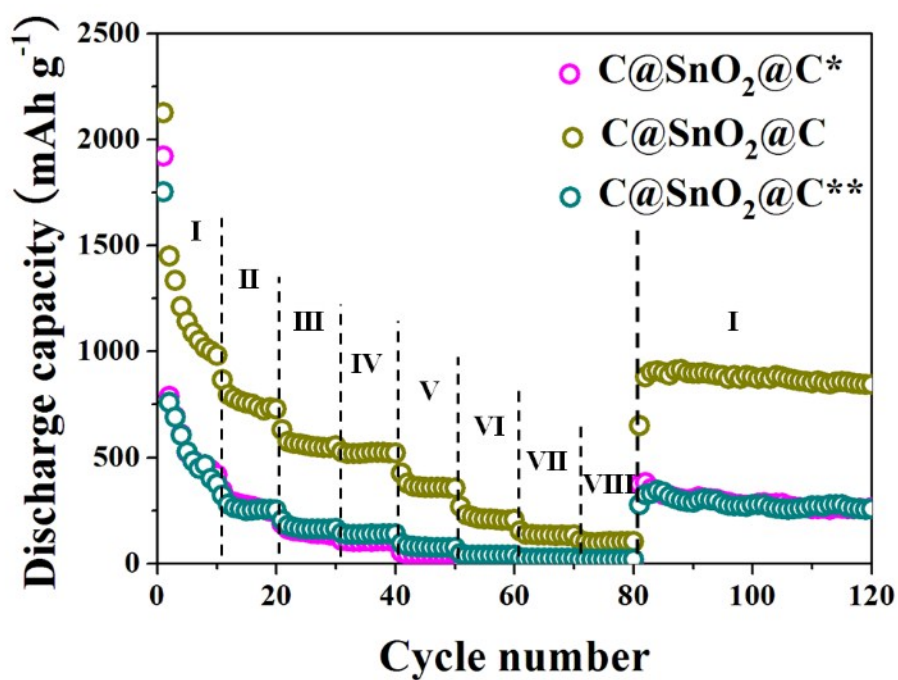

**Fig. S14.** Rate capabilities of C@SnO<sub>2</sub>@C\*, C@SnO<sub>2</sub>@C and C@SnO<sub>2</sub>@C\*\*. The current density at each stage: I = 0.2 A g<sup>-1</sup>, II = 0.4 A g<sup>-1</sup>, III = 0.8 A g<sup>-1</sup>, IV = 1.0 A g<sup>-1</sup>, V = 2.0 A g<sup>-1</sup>, VI = 4.0 A g<sup>-1</sup>, VII = 6.0 A g<sup>-1</sup>, VIII = 8.0 A g<sup>-1</sup>.

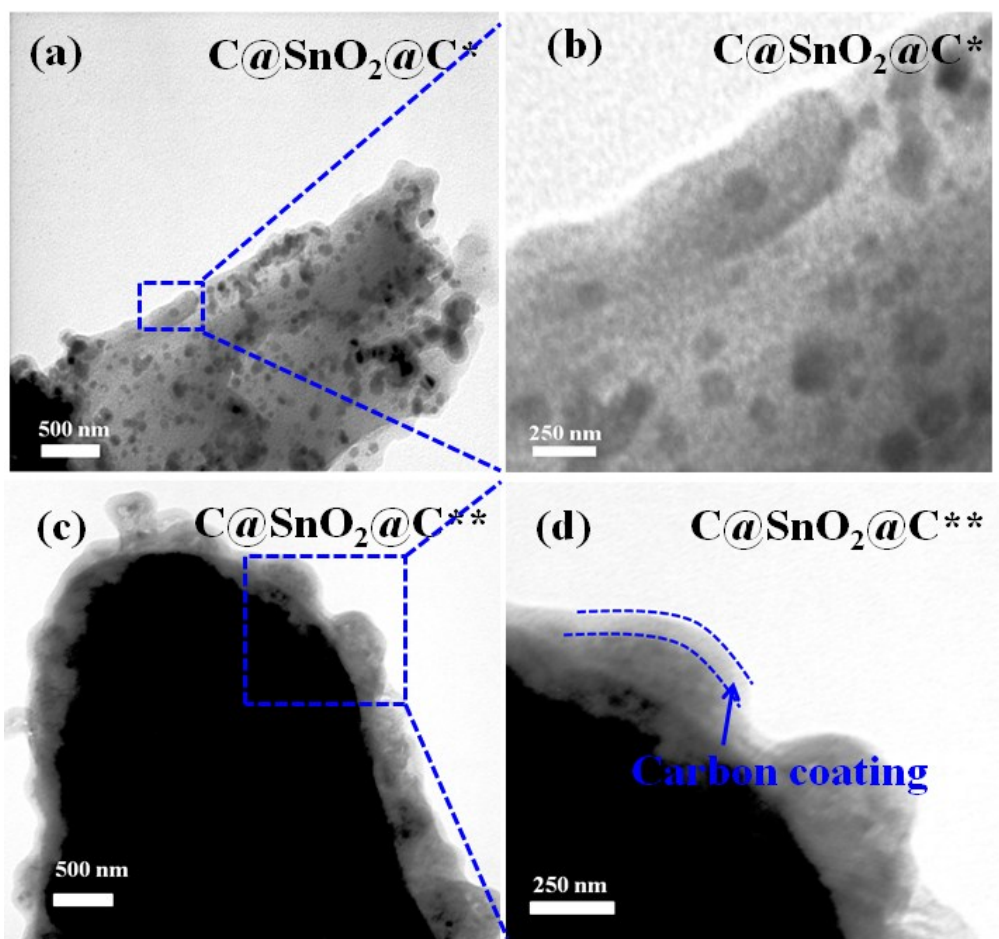

**Fig. S15.** TEM images of (a, b)  $C@SnO_2@C^*$  and (c, d)  $C@SnO_2@C^{**}$ .



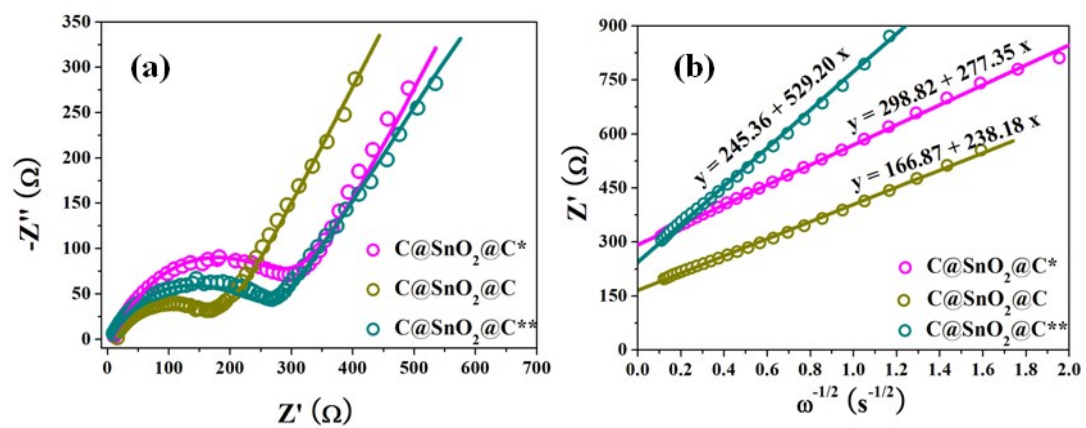

**Fig. S16.** (a) EIS of  $C@SnO_2@C^*$ ,  $C@SnO_2@C$  and  $C@SnO_2@C^{**}$  after the rate tests and (b) the corresponding relationship between  $Z'$  and  $\omega^{-1/2}$  in the low-frequency region.

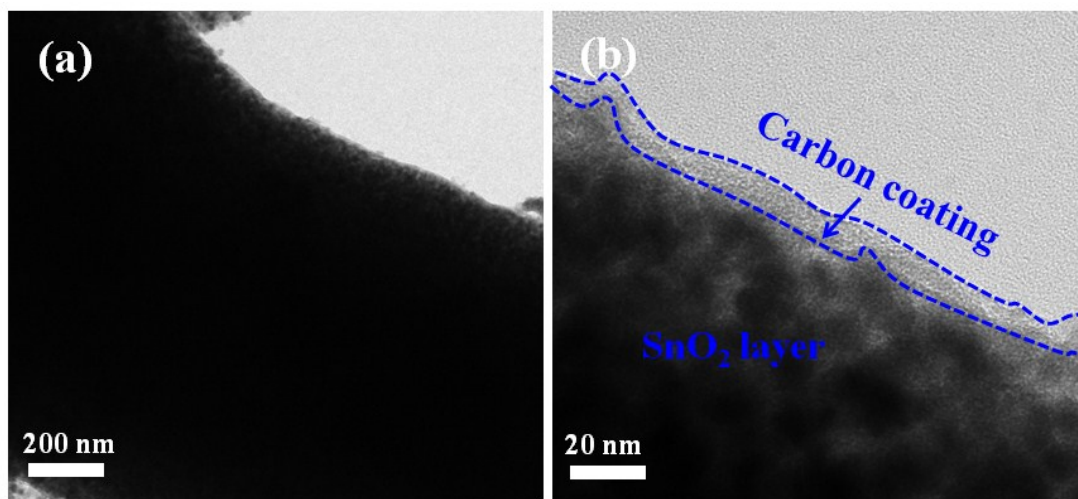

**Fig. S17.** TEM images of SnO<sub>2</sub>@C at different magnifications.

**Table S1.** EIS parameters obtained by fitting the Nyquist plots of C@SnO<sub>2</sub>@C, C@SnO<sub>2</sub>@C\* and C@SnO<sub>2</sub>@C\*\* after the rate tests using the equivalent electrical circuit model.

| Sample                  | R <sub>ct</sub> (Ω) | Z <sub>w</sub> (Ω) |
|-------------------------|---------------------|--------------------|
| C@SnO <sub>2</sub> @C   | 167.2               | 150.6              |
| C@SnO <sub>2</sub> @C * | 309.4               | 289.6              |
| C@SnO <sub>2</sub> @C** | 260.1               | 486.3              |

**Table S2.** Discharge capacity of various carbon/SnO<sub>2</sub> nanocomposites.

| Sample                                                                   | Discharge capacity<br>(mAh g <sup>-1</sup> ) | Current density<br>(mA g <sup>-1</sup> ) | Cycle<br>number | Reference |
|--------------------------------------------------------------------------|----------------------------------------------|------------------------------------------|-----------------|-----------|
| C@SnO <sub>2</sub> @C<br>nanofiber bundle                                | 500                                          | 500                                      | 100             | This work |
| SnO <sub>2</sub> @carbon<br>hollow<br>nanospheres                        | 460                                          | 500                                      | 100             | 6         |
| CNFs@SnO <sub>2</sub><br>core-shell<br>structures                        | 460                                          | 200                                      | 50              | 7         |
| Mesoporous SnO <sub>2</sub><br>overlaying<br>MWCNTs hybrid<br>composites | 344.5                                        | 33.3                                     | 50              | 8         |
| SnO <sub>2</sub> @carbon<br>nanofibers                                   | 420                                          | 100                                      | 100             | 9         |
| CNTs/mesoporous<br>SnO <sub>2</sub>                                      | 464                                          | 626                                      | 40              | 10        |
| SnO <sub>2</sub> /carbon<br>hollow spheres                               | 473                                          | 100                                      | 50              | 11        |
| Carbon-coated<br>SnO <sub>2</sub> nanocolloids                           | 440                                          | 300                                      | 100             | 12        |

**Table S3.** EIS parameters obtained by fitting the Nyquist plots of C@SnO<sub>2</sub>@C, C@SnO<sub>2</sub> and SnO<sub>2</sub>@C before and after cycled at 0.5 A g<sup>-1</sup> and 1.0 A g<sup>-1</sup> using the equivalent electrical circuit model.

|                     | C@SnO <sub>2</sub> @C                                       | C@SnO <sub>2</sub>  | SnO <sub>2</sub> @C |
|---------------------|-------------------------------------------------------------|---------------------|---------------------|
| R <sub>ct</sub> (Ω) | 201.3 <sup>a</sup> (168.4 <sup>b</sup> /27.2 <sup>c</sup> ) | 108.1 (112.3/25.0)  | 79.1 (103.6/70.3)   |
| Z <sub>w</sub> (Ω)  | 180.1 <sup>a</sup> (143.6 <sup>b</sup> /94.2 <sup>c</sup> ) | 158.2 (179.7/218.5) | 350.6 (278.7/193.0) |

<sup>a</sup> Parameters obtained by fitting the Nyquist plots of electrode materials before the rate tests.

<sup>b</sup> Parameters obtained by fitting the Nyquist plots of electrode materials after cycled at 0.5 A g<sup>-1</sup>.

<sup>c</sup> Parameters obtained by fitting the Nyquist plots of electrode materials after cycled at 1.0 A g<sup>-1</sup>.

## References

1. T. Okuda and H. Ito, *Molecules*, 2011, **16**, 2191-2217.
2. X. Huang, H. Wu, X. P. Liao and B. Shi, *Green Chem.*, 2010, **12**, 395-399.
3. I. Mueller-Harvey, *Anim. Feed Sci. Technol.*, 2001, **91**, 3-20.
4. N. A. Evans, B. Miligan and K. C. Montgomery, *J. Am. Leather Chem. Assoc.*, 1987, **82**, 86-95.
5. J. X. Wang, W. Li, F. Wang, Y. Y. Xia, A. M. Asiri and D. Y. Zhao, *Nanoscale*, 2014, **6**, 3217-3222.
6. X. W. Lou, C. M. Li and L. A. Archer, *Adv. Mater.*, 2009, **21**, 2536-2539.
7. L. Zhang, G. Q. Zhang, H. B. Wu, L. Yu and X. W. Luo, *Adv. Mater.*, 2013, **25**, 2589-2593.
8. Z. H. Wen, Q. Wang, Q. Zhang and J. H. Li, *Adv. Funct. Mater.*, 2007, **17**, 2772-2778.
9. Z. X. Yang, G. D. Du, Z. P. Guo, X. B. Yu, Z. X. Chen, P. Zhang, G. N. Chen and H. K. Liu, *J. Mater. Res.*, 2010, **25**, 1516-1524.
10. G. Chen, Z. Y. Wang and D. G. Xia, *Chem. Mater.*, 2008, **20**, 6951-6956.
11. X. W. Lou, D. Deng, J. Y. Lee and L. A. Archer, *Chem. Mater.*, 2008, **20**, 6562-6566.
12. X. W. Lou, J. S. Chen, P. Chen and L. A. Archer, *Chem. Mater.*, 2009, **21**, 2868-2874.
